# Supplementary material
Source: publisher figshare collection journal article supplement (https://frontiersin.figshare.com/ndownloader/files/28449252)
Supplement: Supplementary file [file 28449252]

## *Supplementary Material*

Table 1. Descriptive analysis of the items of the measure of causal attributions of overindebtedness

| Items                                                          | <i>M</i> | <i>SD</i> | <i>Sk</i> | <i>Sk/SE<sub>Sk</sub></i> | <i>Ku</i> | <i>Ku/SE<sub>Ku</sub></i> |
|----------------------------------------------------------------|----------|-----------|-----------|---------------------------|-----------|---------------------------|
| 1. Increase of the household                                   | 2.93     | 1.44      | -0.04     | -0.31                     | -1.28     | -4.65                     |
| 2. Late salary payments                                        | 3.57     | 1.57      | -0.71     | -5.15                     | -1.08     | -3.95                     |
| 3. Unstable work conditions                                    | 3.41     | 1.52      | -0.49     | -3.51                     | -1.20     | -4.30                     |
| 4. Salary cuts                                                 | 3.74     | 1.48      | -0.90     | -6.58                     | -0.66     | -2.41                     |
| 5. Unemployment                                                | 3.95     | 1.60      | -1.15     | -8.34                     | -0.45     | -1.62                     |
| 6. Unemployment of spouse                                      | 3.67     | 1.53      | -0.85     | -6.13                     | -0.80     | -2.89                     |
| 7. Divorce/separation                                          | 3.30     | 1.44      | -0.44     | -3.18                     | -1.11     | -4.02                     |
| 8. Disease/work incapacitation                                 | 3.80     | 1.46      | -0.99     | -7.26                     | -0.48     | -1.75                     |
| 9. Impulsive buying                                            | 3.57     | 1.46      | -0.72     | -5.18                     | -0.88     | -3.20                     |
| 10. Bad management of monthly budget                           | 3.78     | 1.30      | -0.93     | -6.72                     | -0.21     | -0.78                     |
| 11. Lack of appropriate knowledge about credit                 | 3.60     | 1.33      | -0.71     | -5.20                     | -0.60     | -2.18                     |
| 12. Misfortune in financial issues                             | 2.63     | 1.35      | 0.29      | 2.13                      | -1.08     | -3.94                     |
| 13. Problems with Guarantor                                    | 2.61     | 1.46      | 0.38      | 2.55                      | -1.20     | -4.31                     |
| 14. High taxes                                                 | 3.28     | 1.38      | -0.35     | -2.50                     | -1.07     | -3.92                     |
| 15. Easy access to credit                                      | 3.65     | 1.32      | -0.77     | -5.63                     | -0.47     | -1.71                     |
| 16. Unsuccessful financial investments                         | 3.25     | 1.48      | -0.36     | -2.56                     | -1.25     | -4.47                     |
| 17. Bad advice by banking entity                               | 3.35     | 1.38      | -0.46     | -3.30                     | -0.98     | -3.52                     |
| 18. Failure in individual business ventures                    | 3.37     | 1.50      | -0.50     | -3.63                     | -1.16     | -4.21                     |
| 19. Reduction in overtime payment                              | 2.72     | 1.28      | 0.09      | 0.61                      | -1.06     | -3.78                     |
| 20. Excessive resort to credit (Credit cards, personal credit) | 4.02     | 1.33      | -1.32     | -9.66                     | 0.52      | 1.89                      |
| 21. Victim of scam or fraud                                    | 3.09     | 1.59      | -0.16     | -1.15                     | -1.53     | -5.51                     |
| 22. Refusal of precarious work                                 | 2.49     | 1.35      | 0.36      | 2.56                      | -1.07     | -3.83                     |
| 23. Difficulty adjusting to the new economic reality           | 3.31     | 1.23      | -0.27     | -2.00                     | -0.78     | -2.87                     |
| 24. Current financial crisis                                   | 3.57     | 1.19      | -0.45     | -3.31                     | -0.64     | -2.35                     |
| 25. Debt "Snowball" effect                                     | 4.08     | 1.29      | -1.36     | -9.99                     | 0.66      | 2.46                      |

*Note.* *M* = Mean; *SD* = Standard deviation; *Sk* = Skewness; *SE<sub>Sk</sub>* = Standard Error of Skewness; *Ku* = Kurtosis; *SE<sub>Ku</sub>* = Standard Error of Kurtosis.

Table 2. Descriptive analysis of the items of the measure of attitudes towards the overindebted

| Items                                                                                | <i>M</i> | <i>SD</i> | <i>Sk</i> | <i>Sk/SE<sub>Sk</sub></i> | <i>Ku</i> | <i>Ku/SE<sub>Ku</sub></i> |
|--------------------------------------------------------------------------------------|----------|-----------|-----------|---------------------------|-----------|---------------------------|
| 1. Overindebted people have not had the same opportunities as other people           | 2.76     | 1.35      | 0.23      | 1.63                      | -1.05     | -3.77                     |
| 2. People are overindebted usually due to circumstances beyond their control         | 3.23     | 1.27      | -0.11     | -0.80                     | -1.02     | -3.65                     |
| 3. Society is responsible for helping overindebted people                            | 2.82     | 1.31      | 0.13      | 0.91                      | -1.04     | -3.70                     |
| 4. If overindebted people worked harder. they could escape their debt situation      | 3.28     | 1.25      | -0.24     | -1.73                     | -0.83     | -2.96                     |
| 5. Overindebted people are discriminated against.                                    | 3.02     | 1.29      | -0.02     | -0.15                     | -1.00     | -3.57                     |
| 6. Unemployed overindebted people could find jobs if they tried harder.              | 2.98     | 1.28      | 0.05      | 0.38                      | -0.95     | -3.40                     |
| 7. Overindebted people should not be blamed for their misfortune.                    | 2.50     | 1.31      | 0.51      | 3.64                      | -0.85     | -3.04                     |
| 8. Overindebted people are less capable. in general compared to other people.        | 2.13     | 1.21      | 0.85      | 6.08                      | -0.25     | -0.91                     |
| 9. Overindebted people have a different set of values to other people.               | 2.17     | 1.14      | 0.64      | 4.54                      | -0.50     | -1.80                     |
| 10. Overindebted situations are due to overindebted people's irresponsible spending. | 3.10     | 1.35      | -0.07     | -0.49                     | -1.10     | -3.95                     |

*Note.* *M* = Mean; *SD* = Standard deviation; *Sk* = Skewness; *SE<sub>Sk</sub>* = Standard Error of Skewness; *Ku* = Kurtosis; *SE<sub>Ku</sub>* = Standard Error of Kurtosis.

Table 3. Means and standard deviations of responses to each factor in the measure of causal attribution from overindebted and non-overindebted participants in Study 1.

| Causes of overindebtedness | Overindebted |           | Non-overindebted |           |
|----------------------------|--------------|-----------|------------------|-----------|
|                            | <i>M</i>     | <i>SD</i> | <i>M</i>         | <i>SD</i> |
| Situational                | 3.44         | 1.24      | 3.89             | 0.74      |
| Dispositional              | 3.76         | 1.01      | 4.05             | 0.89      |

Table 4. Means and standard deviations for attitudes in the measure of attitudes towards the overindebted in Study 2.

| Attitudes towards the overindebted | <i>M</i> | <i>SD</i> |
|------------------------------------|----------|-----------|
| Victimizing                        | 2.50     | 0.69      |
| Blaming                            | 3.34     | 0.78      |
